# Supplementary material for: Abdominal Obesity Is Associated with an Increased Risk of All-Cause Mortality in Males but Not in Females with HFpEF
Source: Hindawi journal article supplement (doi:10.1155/2022/2950055), 2022-04-09
Supplement: f1 [file 2950055.f1.pdf]

**Table S1 Demographic and Clinical Characteristics of Female Patients**

| Characteristics                           | Abdominal Obesity |               |         |
|-------------------------------------------|-------------------|---------------|---------|
|                                           | No(n=304)         | Yes(n=1396)   | p Value |
| <b>Age (year, mean ± SD)</b>              | 69.96±9.77        | 69.14±9.39    | 0.181   |
| <b>Race No. (%)</b>                       |                   |               |         |
| White                                     | 283(93.09%)       | 1,216(87.11%) | 0.003   |
| Black                                     | 12(3.95%)         | 152(10.89%)   | <0.001  |
| Other                                     | 10(3.29%)         | 33(2.36%)     | 0.352   |
| <b>BMI, (kg/m<sup>2</sup>, mean ± SD)</b> |                   |               |         |
| <18.5                                     | 5(1.64%)          | 0(0)          | <0.001  |
| 18.5-24.9                                 | 163(53.62%)       | 70(5.01%)     | <0.001  |
| 25-29.9                                   | 112(36.84%)       | 374(26.79%)   | <0.001  |
| ≥30.0                                     | 24(29.61%)        | 953(68.27%)   | <0.001  |
| <b>Heart rate (mean ± SD)</b>             | 68.65±9.45        | 69.27±10.30   | 0.311   |
| <b>Blood pressure (mm/Hg, mean ± SD)</b>  |                   |               |         |
| SBP                                       | 128.31±13.09      | 130.97±14.15  | 0.002   |
| DBP                                       | 75.81±10.78       | 76.57±10.63   | 0.266   |

|                                               |             |               |        |
|-----------------------------------------------|-------------|---------------|--------|
| <b>NYHA functional classification No. (%)</b> |             |               | 0.071  |
| I & II                                        | 214(70.39%) | 907(64.97%)   |        |
| III & IV                                      | 90(29.61%)  | 489(35.03%)   |        |
| <b>Comorbidities No. (%)</b>                  |             |               |        |
| Hypertension                                  | 273(89.80%) | 1,313(94.05%) | 0.007  |
| Hospitalization for heart failure             | 215(70.72%) | 1,022(73.21%) | 0.378  |
| MI                                            | 46(15.13%)  | 279(19.99%)   | 0.051  |
| CABG                                          | 17(5.59%)   | 100(7.16%)    | 0.327  |
| Diabetes mellitus                             | 39(12.83%)  | 475(34.03%)   | <0.001 |
| Dyslipidemia                                  | 139(45.72%) | 822(58.88%)   | <0.001 |
| COPD                                          | 17(5.59%)   | 129(9.24%)    | 0.040  |
| Stroke                                        | 15(4.93%)   | 117(8.38%)    | 0.042  |
| <b>Laboratory (mean ± SD)</b>                 |             |               |        |
| Creatinine(mg/dL)                             | 0.93±0.23   | 1.01±0.26     | <0.001 |
| eGFR (ml/min/1.73 m <sup>2</sup> )            | 68.64±23.15 | 64.23±18.95   | 0.002  |
| Sodium(mmol/L)                                | 141.73±4.98 | 141.35±4.07   | 0.224  |
| Potassium(mmol/L)                             | 4.24±0.46   | 4.24±0.45     | 0.976  |
| ALT(UL)                                       | 22.87±12.19 | 24.61±13.91   | 0.023  |

|                                                 |               |                 |        |
|-------------------------------------------------|---------------|-----------------|--------|
| Glucose(mg/dL)                                  | 100.50±35.23  | 116.26±48.32    | <0.001 |
| BNP (pg/ml)                                     | 468.30± 50.07 | 359.67± 389.90  | 0.308  |
| NT-proBNP (pg/ml)                               | 2031± 2413.03 | 1446.21±2322.48 | 0.086  |
| <b>Medications No. (%)</b>                      |               |                 |        |
| ACE-I/ARB                                       | 245(80.59%)   | 1,193(85.46%)   | 0.033  |
| Diuretic                                        | 217(71.38%)   | 1,187(85.035)   | <0.001 |
| Beta blockers                                   | 228(75.00%)   | 1,068(76.50%)   | 0.577  |
| Aspirin                                         | 199(65.46%)   | 897(64.26%)     | 0.691  |
| Statin                                          | 112(36.84%)   | 668(47.85%)     | <0.001 |
| Calcium channel blocker                         | 98(32.24%)    | 569(40.76%)     | 0.006  |
| Hypoglycemic agent                              | 32(10.53%)    | 403(28.87%)     | <0.001 |
| <b>Currently smoke No. (%)</b>                  | 27(8.88%)     | 65(4.66%)       | 0.003  |
| <b>Alcohol drinks in the past weeks No. (%)</b> |               |                 |        |
| None                                            | 261(85.86%)   | 1230(88.11%)    | 0.278  |
| 1–4                                             | 34(11.18%)    | 139(9.96%)      | 0.521  |
| 5–10                                            | 8(2.63%)      | 21(1.50%)       | 0.169  |
| >11                                             | 1(0.33%)      | 6(0.43%)        | 0.803  |
| <b>Mean KCCQ overall score (mean ± SD)</b>      | 54.22±52.21   | 50.86±49.83     | 0.004  |

|             |            |             |       |
|-------------|------------|-------------|-------|
| PHQ No. (%) |            |             | 0.004 |
| <10         | 72(23.68%) | 384(27.51%) |       |
| >=10        | 18(5.92%)  | 155(11.10%) |       |

---

**Table S2 Demographic and Clinical Characteristics of Male Patients**

| Characteristics                               | Abdominal Obesity |              |         |
|-----------------------------------------------|-------------------|--------------|---------|
|                                               | No(n=595)         | Yes(n=1025)  | p Value |
| <b>Age (year, mean ± SD)</b>                  | 68.50± 9.98       | 67.25±9.35   | 0.013   |
| <b>Race No. (%)</b>                           |                   |              |         |
| White                                         | 549(92.27%)       | 942(91.90%)  | 0.793   |
| Black                                         | 26(4.37%)         | 63(6.15%)    | 0.130   |
| Other                                         | 22(3.70%)         | 20(1.95%)    | 0.033   |
| <b>BMI, (kg/m<sup>2</sup>, mean ± SD)</b>     |                   |              |         |
| <18.5                                         | 9(1.51%)          | 0(0)         | <0.001  |
| 18.5-24.9                                     | 163(27.39%)       | 13(1.27%)    | <0.001  |
| 25-29.9                                       | 339(56.97%)       | 249(24.29%)  | <0.001  |
| ≥30.0                                         | 84(14.12%)        | 763(74.44%)  | <0.001  |
| <b>Heart rate (mean ± SD)</b>                 | 67.69±9.99        | 69.18±10.75  | 0.005   |
| <b>Blood pressure (mm/Hg, mean ± SD)</b>      |                   |              |         |
| SBP                                           | 127.16±13.09      | 128.47±13.87 | 0.058   |
| DBP                                           | 76.13±9.88        | 75.12± 10.77 | 0.057   |
| <b>NYHA functional classification No. (%)</b> |                   |              | <0.001  |

|                                    |              |              |        |
|------------------------------------|--------------|--------------|--------|
| I & II                             | 457(76.81%)  | 672(65.56%)  |        |
| III & IV                           | 138(23.19%)  | 353(34.44%)  |        |
| <b>Comorbidities No. (%)</b>       |              |              |        |
| Hypertension                       | 520(87.39%)  | 934(91.12%)  | 0.017  |
| Hospitalization for heart failure  | 432(72.61%)  | 743(72.49%)  | 0.959  |
| MI                                 | 218(36.64%)  | 336(32.78%)  | 0.115  |
| CABG                               | 101(16.97%)  | 210(20.49%)  | 0.084  |
| Diabetes mellitus                  | 117(19.66%)  | 437(42.63%)  | <0.001 |
| Dyslipidemia                       | 352(59.16%)  | 688(67.12%)  | 0.001  |
| COPD                               | 62(10.42%)   | 167(16.29%)  | 0.001  |
| Stroke                             | 43(7.23%)    | 78(7.61%)    | 0.778  |
| <b>Laboratory (mean ± SD)</b>      |              |              |        |
| Creatinine(mg/dL)                  | 1.15±0.28    | 1.21±0.01    | <0.001 |
| eGFR (ml/min/1.73 m <sup>2</sup> ) | 72.76±20.52  | 69.49±19.42  | 0.002  |
| Sodium (mmol/L)                    | 141.07±4.26  | 141.17±4.21  | 0.662  |
| Potassium (mmol/L)                 | 4.30±0.43    | 4.26±0.44    | 0.082  |
| ALT (UL)                           | 24.68±13.32  | 26.91±15.92  | 0.003  |
| Glucose (mg/dL)                    | 107.19±33.71 | 122.87±55.11 | <0.001 |

|                                                 |                  |                  |        |
|-------------------------------------------------|------------------|------------------|--------|
| BNP (pg/ml)                                     | 440.97±481.97    | 364.44±349.15    | 0.132  |
| NT-proBNP (pg/ml)                               | 1813.76± 2408.90 | 1224.97± 1669.34 | 0.020  |
| <b>Medications No. (%)</b>                      |                  |                  |        |
| ACE-I/ARB                                       | 494(83.04%)      | 875(85.37%)      | 0.193  |
| Diuretic                                        | 429(72.10%)      | 871(84.98%)      | <0.001 |
| Beta blockers                                   | 478(80.34%)      | 810(79.02%)      | 0.553  |
| Aspirin                                         | 407(68.40%)      | 677(66.05%)      | 0.345  |
| Statin                                          | 312(52.44%)      | 632(61.66%)      | <0.001 |
| Calcium channel blocker                         | 195(32.77%)      | 380(37.07%)      | 0.079  |
| Hypoglycemic agent                              | 95(15.97%)       | 385(37.56%)      | <0.001 |
| <b>currently smoke No. (%)</b>                  | 116(19.5%)       | 144(14.05%)      | 0.004  |
| <b>Alcohol drinks in the past weeks No. (%)</b> |                  |                  |        |
| None                                            | 392(65.88%)      | 712(69.46%)      | 0.136  |
| 1–4                                             | 150(25.21%)      | 232(22.63%)      | 0.239  |
| 5–10                                            | 37(6.22%)        | 53(5.17%)        | 0.375  |
| >11                                             | 16(2.69%)        | 28(2.73%)        | 0.959  |
| <b>Mean KCCQ overall score (mean ± SD)</b>      | 61.15±19.90      | 57.00±21.15      | <0.001 |
| PHQ No. (%)                                     |                  |                  | <0.001 |

|      |             |             |
|------|-------------|-------------|
| <10  | 157(26.39%) | 382(37.27%) |
| >=10 | 38(6.39%)   | 133(12.98%) |

---
